# Supplementary material for: Racial bias and reproducibility in pulse oximetry among medical and surgical inpatients in general care in the Veterans Health Administration 2013-19: multicenter, retrospective cohort study
Source: PubMed Central journal article supplement (PMC9254870; doi:10.1136/bmj-2021-069775), 2022-07-06

**Article Title**

Racial Bias and Reproducibility in Pulse Oximetry Among General Care Medical and Surgical Inpatients in the Veterans Health Administration 2013-2019: A Cohort Study

**Authors**

Valeria S. M. Valbuena, MD, MSc<sup>\*1,2,3</sup>; Sarah Seelye, PhD<sup>\*2</sup>; Michael W. Sjoding, MD, MSc<sup>4</sup>; Thomas S. Valley, MD, MSc<sup>2,4</sup>; Robert P. Dickson, MD<sup>4</sup>; Steven E. Gay MD<sup>4</sup>; Dru Claar, MD<sup>4</sup>; Hallie C. Prescott, MD, MSc<sup>2,4</sup>; Theodore J. Iwashyna, MD, PhD<sup>2,3,4</sup>

\* These authors contributed equally to this work

**Affiliations**

<sup>1</sup> Department of Surgery, University of Michigan, Ann Arbor, Michigan

<sup>2</sup> Veterans Affairs Center for Clinical Management Research, Ann Arbor, Michigan

<sup>3</sup> National Clinician Scholars Program, University of Michigan, Ann Arbor, Michigan

<sup>4</sup> Department of Internal Medicine, University of Michigan, Ann Arbor, Michigan

**Contents**

Supplemental analyses, tables, figures, and statistical code

**Corresponding Author**

Theodore J. Iwashyna, MD, PhD

VA CCMR

2800 Plymouth Road, NCRC Building 16, 3<sup>rd</sup> Floor

Ann Arbor, Michigan, 48104, USA

Email: [tiwashyn@umich.edu](mailto:tiwashyn@umich.edu)

Twitter: @iwashyna

## Table of Contents

**Appendix 1.** Comorbidities for patients with pairs of pulse oximetry and arterial oxygen saturation

**Appendix 2.** Analytics code and log files for results

**Appendix 3.** Number of paired SpO<sub>2</sub>-SaO<sub>2</sub> measurements included in the study, stratified by race of Veterans and SpO<sub>2</sub> level and accompanying histograms of SpO<sub>2</sub> & SaO<sub>2</sub>

**Appendix 4.** Characteristics for total VAPD hospitalizations and those with available SpO<sub>2</sub>-SaO<sub>2</sub> pairs only

**Appendix 5.** Bland-Altman Plots and calibration plots by race and ethnicity

**Appendix 6.** Probability of occult hypoxemia for White and Hispanic patients

**Appendix 7.** Probability of occult hypoxemia for Black and White patients. All SpO<sub>2</sub> and SaO<sub>2</sub> values included

**Appendix 8.** Probability of occult hypoxemia for White and Black patients including a hospital-level random effect.

**Appendix 9.** Post hoc sensitivity analyses

**Appendix 1. Comorbidities for patients with pairs of pulse oximetry and arterial oxygen saturation**

|                                         | Patients with 1 pair/day | Patients with 2 pairs/day | <i>p</i> |
|-----------------------------------------|--------------------------|---------------------------|----------|
| Total pairs, N                          | 27,023                   | 3,016                     |          |
| SpO <sub>2</sub> median (IQR)           | 96 (93, 98)              | 95 (92, 98)               | <0.001   |
| SaO <sub>2</sub> , median (IQR)         | 94 (89.7, 96.9)          | 94 (89.8, 97.1)           | 0.186    |
| Total patients, N                       | 27,023                   | 1,508                     |          |
| Comorbidities, N (%)                    |                          |                           |          |
| Congestive heart failure                | 9,479 (35.1)             | 513 (34.0)                | 0.401    |
| Neurologic disease                      | 3,328 (12.3)             | 179 (11.9)                | 0.608    |
| Chronic pulmonary disease               | 14,290 (52.9)            | 758 (50.3)                | 0.048    |
| Liver Disease                           | 2,515 (9.3)              | 138 (9.2)                 | 0.839    |
| Diabetes without complication           | 6,882 (25.5)             | 397 (26.3)                | 0.456    |
| Diabetes with complication              | 4,755 (17.6)             | 255 (16.9)                | 0.495    |
| Non-metastatic cancer                   | 2,867 (10.6)             | 166 (11.0)                | 0.625    |
| Metastatic cancer                       | 1,017 (3.8)              | 69 (4.6)                  | 0.109    |
| Renal disease                           | 7,035 (26.0)             | 351 (23.3)                | 0.017    |
| Cardiac arrhythmia                      | 9,267 (34.3)             | 582 (38.6)                | 0.001    |
| Valvular disease                        | 2,029 (7.5)              | 134 (8.9)                 | 0.049    |
| Pulmonary circulation disorders         | 2,776 (10.3)             | 149 (9.9)                 | 0.625    |
| Peripheral vascular disorders           | 3,169 (11.7)             | 198 (13.1)                | 0.100    |
| Paralysis                               | 560 (2.1)                | 36 (2.4)                  | 0.405    |
| Hypertension with and with complication | 18,769 (69.5)            | 1,030 (68.3)              | 0.344    |
| Hypothyroidism                          | 2,699 (10.0)             | 150 (10.0)                | 0.959    |
| Peptic ulcer disease excluding bleeding | 215 (0.8)                | 8 (0.5)                   | 0.255    |
| Lymphoma                                | 420 (1.6)                | 27 (1.8)                  | 0.472    |
| Coagulopathy                            | 1,722 (6.4)              | 112 (7.4)                 | 0.104    |
| Rheumatoid arthritis                    | 535 (2.0)                | 23 (1.5)                  | 0.215    |
| Fluid and electrolyte disorders         | 10,042 (37.2)            | 543 (36.0)                | 0.367    |
| Blood loss anemia                       | 227 (0.8)                | 13 (0.9)                  | 0.927    |
| Deficiency anemia                       | 1,969 (7.3)              | 91 (6.0)                  | 0.068    |
| Obesity                                 | 3,386 (12.5)             | 189 (12.5)                | 0.997    |
| Weight loss                             | 2,479 (9.2)              | 126 (8.4)                 | 0.283    |
| Alcohol abuse                           | 2,838 (10.5)             | 154 (10.2)                | 0.721    |
| Drug abuse                              | 1,510 (5.6)              | 86 (5.7)                  | 0.850    |
| Depression                              | 5,061 (18.7)             | 249 (16.5)                | 0.031    |
| Psychosis                               | 1,077 (4.0)              | 60 (4.0)                  | 0.990    |

**Appendix 2.** Analytic code (see Supplemental file)

The stata .do files and a .log file for the results section are uploaded as additional text files.

All executable files are available in GitHub <https://github.com/CCMRcodes/RacialBias>

**Appendix 3.** Number of paired SpO<sub>2</sub>-SaO<sub>2</sub> measurements included in the study, stratified by race of Veterans and SpO<sub>2</sub> level and accompanying histograms of SpO<sub>2</sub> & SaO<sub>2</sub>

| SpO <sub>2</sub> level | 89  | 90  | 91  | 92   | 93   | 94   | 95   | 96   | 97   | 98   | 99   | 100  |
|------------------------|-----|-----|-----|------|------|------|------|------|------|------|------|------|
| White                  | 388 | 888 | 963 | 1619 | 1806 | 2303 | 2535 | 2571 | 2212 | 2035 | 1311 | 1765 |
| Black                  | 66  | 149 | 171 | 283  | 321  | 449  | 531  | 673  | 743  | 896  | 731  | 1225 |
| Hispanic               | 24  | 35  | 35  | 73   | 88   | 114  | 138  | 185  | 166  | 159  | 165  | 378  |

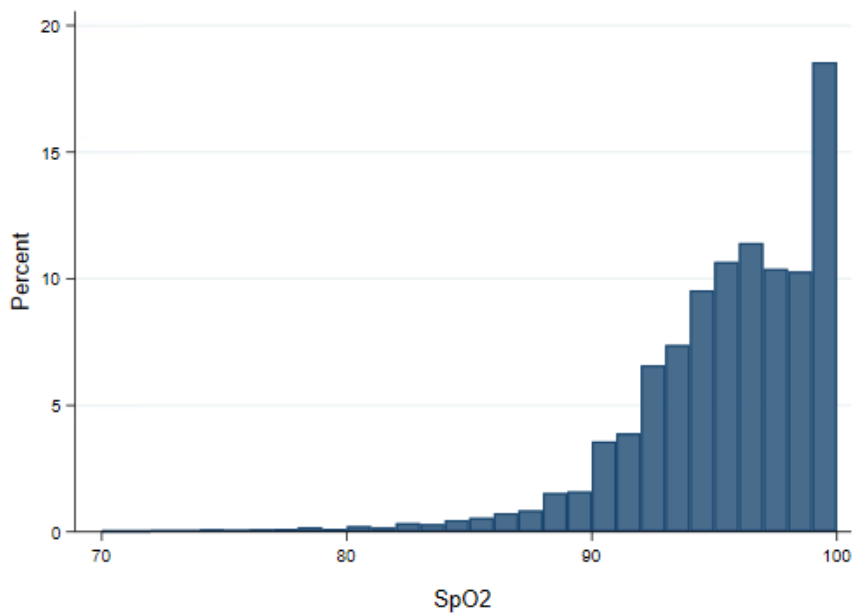

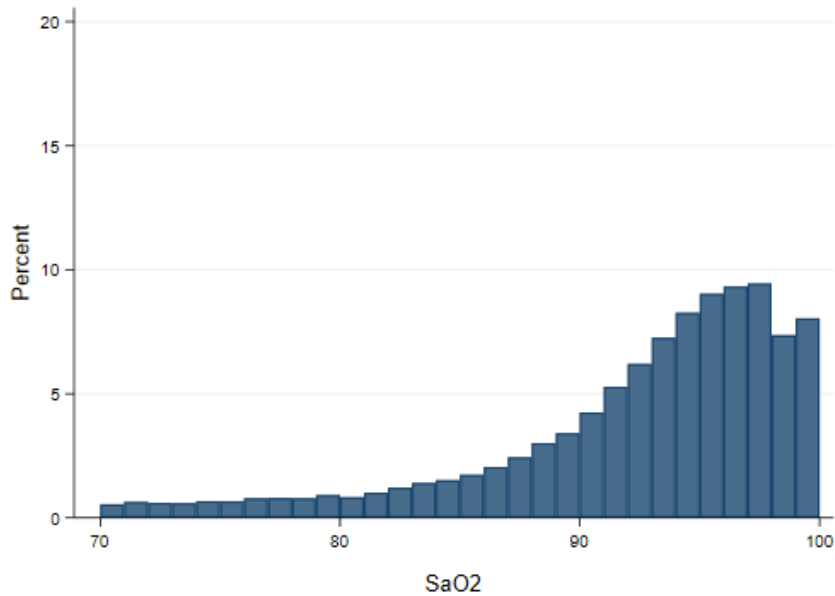

**Appendix 4.** Characteristics for total VAPD hospitalizations and those with available SpO<sub>2</sub>-SaO<sub>2</sub> pairs only

|                                       | SpO <sub>2</sub> -SaO <sub>2</sub> Pairs | VAPD             |
|---------------------------------------|------------------------------------------|------------------|
| Total hospitalizations, N             | 27,427                                   | 3,644,559        |
| Patient characteristics               |                                          |                  |
| Age in years, median (IQR)            | 69 (63, 76)                              | 67 (60, 74)      |
| Male sex, N (%)                       | 26,362 (96.1)                            | 3,445,716 (94.5) |
| Race, N (%)                           |                                          |                  |
| Non-Hispanic White                    | 20,134 (73.4)                            | 2,607,137 (71.5) |
| Non-Hispanic Black                    | 5,930 (21.6)                             | 807,787 (22.2)   |
| Hispanic/Latino                       | 1,363 (5.0)                              | 229,635 (6.3)    |
| Primary Diagnoses, N (%)              |                                          |                  |
| Chronic obstructive pulmonary disease | 3,674 (13.4)                             | 107,658 (3.0)    |
| Respiratory failure                   | 3,380 (12.3)                             | 61,900 (1.7)     |
| Septicemia                            | 2,109 (7.7)                              | 118,539 (3.3)    |
| Pneumonia                             | 1,914 (7.0)                              | 95,402 (2.6)     |
| Congestive heart failure              | 1,822 (6.6)                              | 137,750 (3.8)    |
| Coronary atherosclerosis              | 597 (2.2)                                | 125,799 (3.5)    |
| Diabetes with complication            | 536 (2.0)                                | 69,488 (1.9)     |
| Cardiac dysrhythmia                   | 460 (1.7)                                | 128,321 (3.5)    |
| Renal failure                         | 444 (1.6)                                | 59,778 (1.6)     |
| Acute myocardial infarction           | 328 (1.2)                                | 50,356 (1.4)     |
| Other                                 | 12,163 (44.4)                            | 2,689,568 (73.8) |
| Comorbidities*, N (%)                 |                                          |                  |
| Congestive heart failure              | 9,620 (35.1)                             | 752,698 (20.7)   |
| Neurologic disease                    | 3,350 (12.2)                             | 277,895 (7.6)    |
| Chronic pulmonary disease             | 14,569 (53.1)                            | 926,811 (25.4)   |
| Liver Disease                         | 2,548 (9.3)                              | 318,868 (8.8)    |
| Diabetes without complication         | 7,020 (25.6)                             | 851,028 (23.4)   |

|                                                    |              |                |
|----------------------------------------------------|--------------|----------------|
| Diabetes with complication                         | 4,843 (17.7) | 494,273 (13.4) |
| Non-metastatic cancer                              | 2,870 (10.5) | 396,882 (10.9) |
| Metastatic cancer                                  | 1,050 (3.8)  | 133,121 (3.7)  |
| Renal disease                                      | 7,128 (26.0) | 749,215 (20.6) |
| Length of hospitalization in days,<br>median (IQR) | 6 (3, 10)    | 4 (2, 6)       |
| Mortality                                          |              |                |
| In-hospital mortality, N (%)                       | 1,390 (5.1)  | 55,013 (1.5)   |
| 30-d mortality, N (%)                              | 2,764 (10.1) | 152,051 (4.2)  |

## Appendix 5. Bland-Altman plots and calibration plots by race and ethnicity

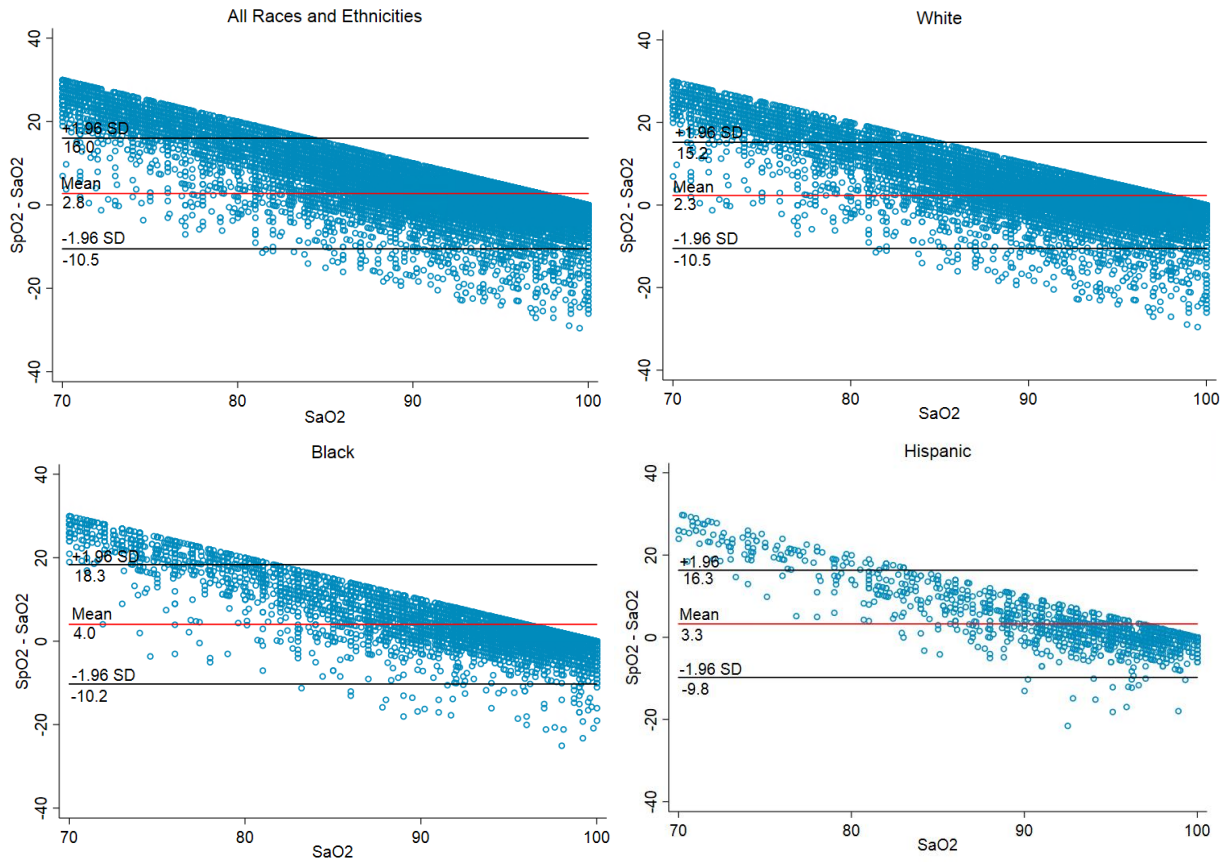

| All Available SpO <sub>2</sub> -SaO <sub>2</sub> Pairs |                   |                     |                    |                       |
|--------------------------------------------------------|-------------------|---------------------|--------------------|-----------------------|
|                                                        | All<br>(N=30,039) | White<br>(n=21,918) | Black<br>(n=6,498) | Hispanic<br>(n=1,623) |
| Bias, %                                                | 2.8               | 2.3                 | 4.0                | 3.3                   |
| Precision, SD                                          | 6.8               | 6.6                 | 7.3                | 6.7                   |
| Upper limit of agreement, %                            | 16.0              | 15.2                | 18.3               | 16.3                  |
| Lower limit of agreement, %                            | -10.5             | -10.5               | -10.3              | -9.8                  |
| Root mean square error, %                              | 7.3               | 7.0                 | 8.3                | 7.4                   |



# Calibration plots by race and ethnicity

## All Races

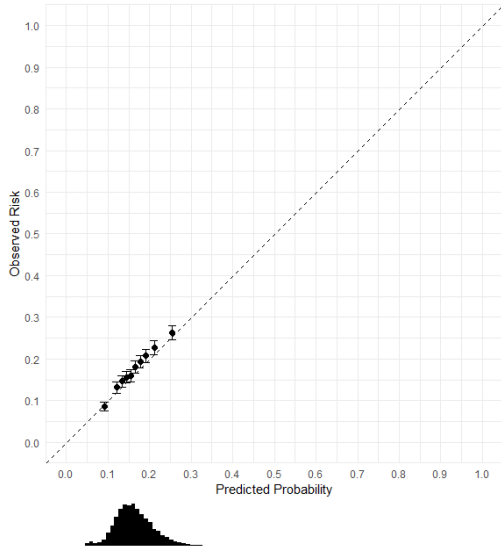

## Black

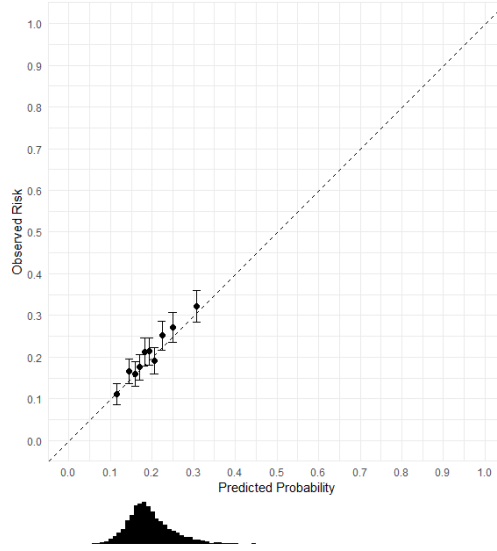

## White

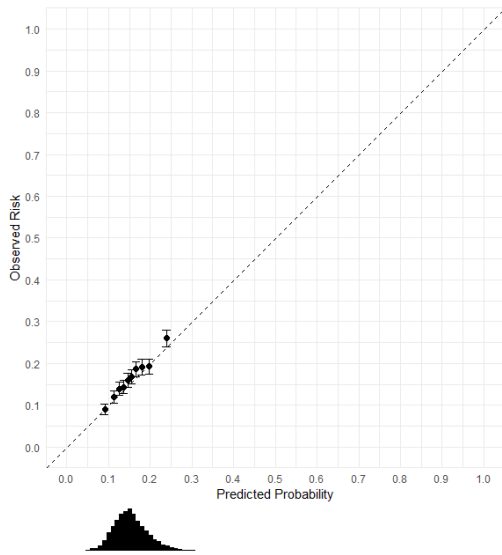

## Hispanic

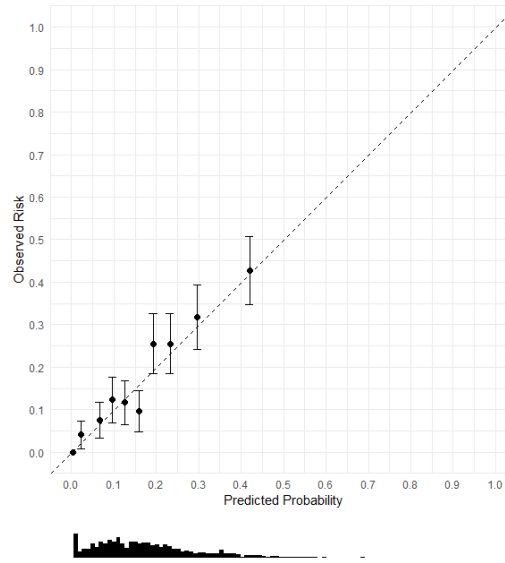

## Appendix 6. Probability of occult hypoxemia for White and Hispanic patients

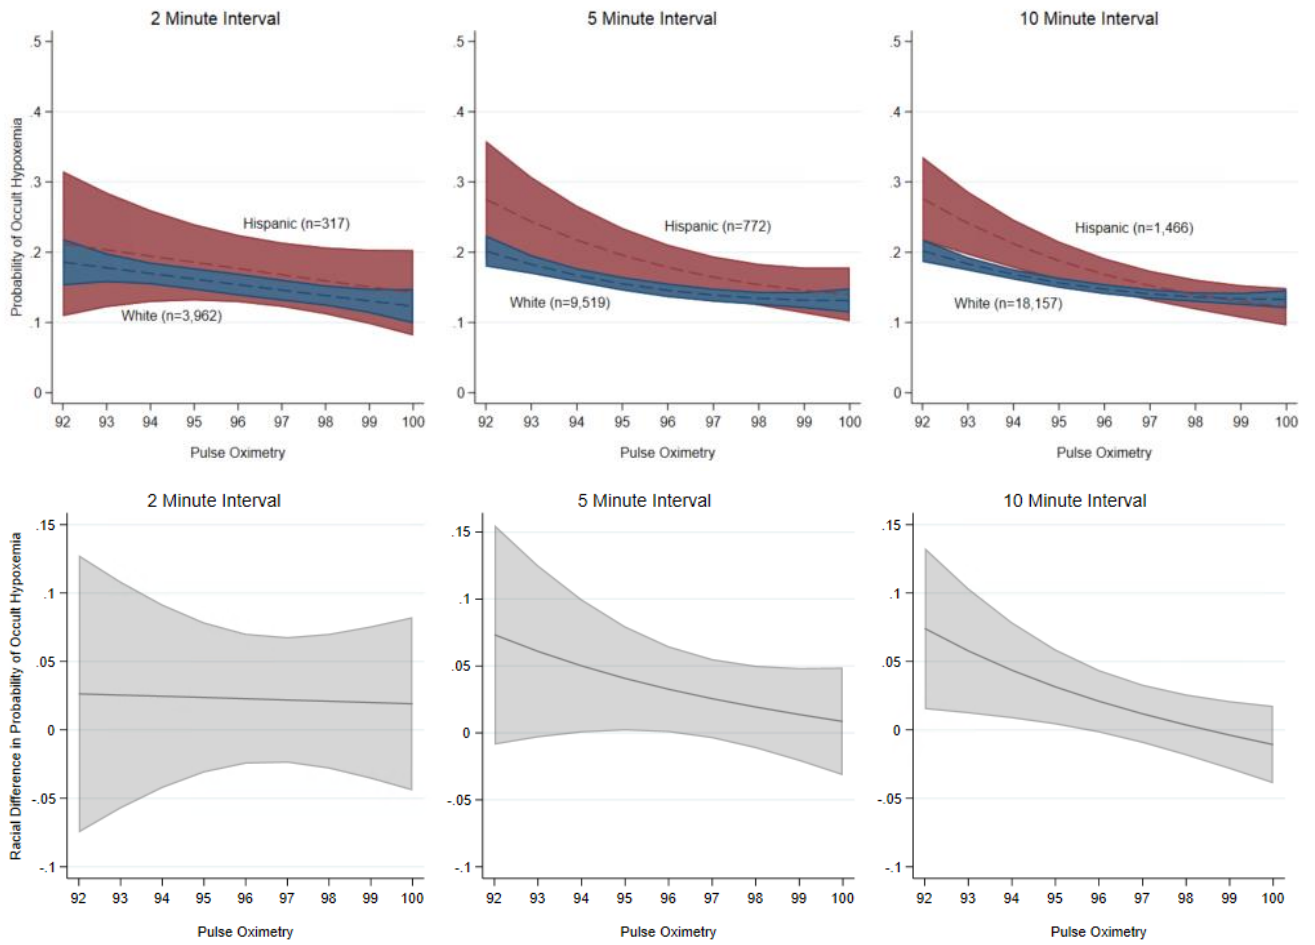

**Appendix 7.** Probability of occult hypoxemia for Black and White patients. All SpO<sub>2</sub> values included (i.e. not restricting model to SpO<sub>2</sub> ≤ 92%)

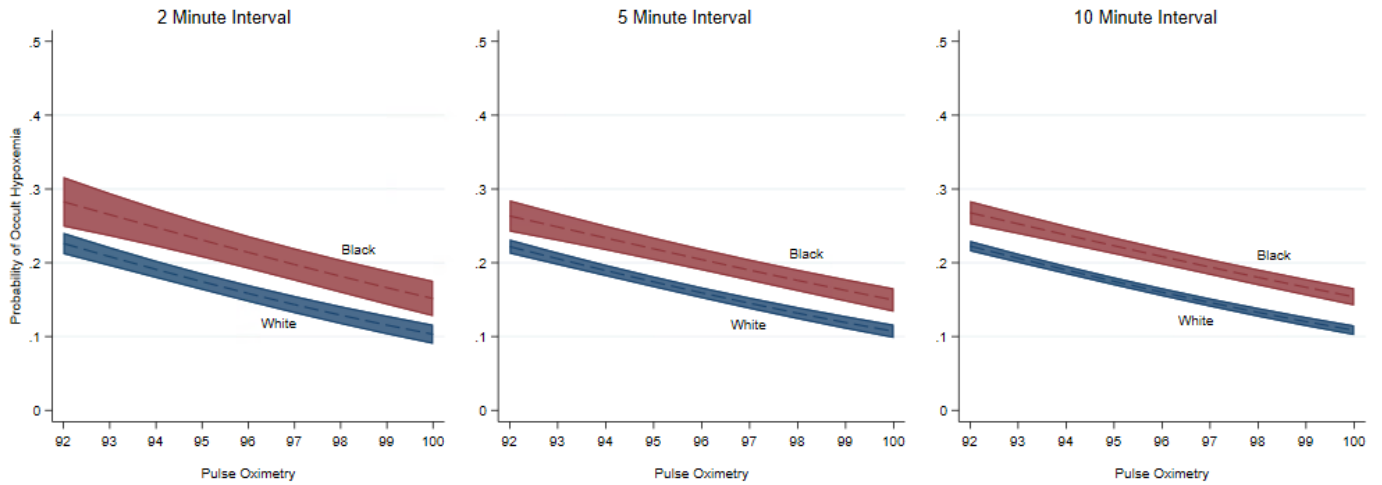

Note: When we include **all** SpO<sub>2</sub> values, in the 10-minute interval, 22.8% of Black patients and 18.1% of White patients had SaO<sub>2</sub><88%. This is a 4.6% difference (CI=3.3%, 6.0%).

Probability of occult hypoxemia for Black and White patients. All SpO<sub>2</sub> and SaO<sub>2</sub> values included (i.e. not dropping SpO<sub>2</sub> or SaO<sub>2</sub> < 70%)

**Black and White - Including all SpO<sub>2</sub>s and SaO<sub>2</sub>s <70**

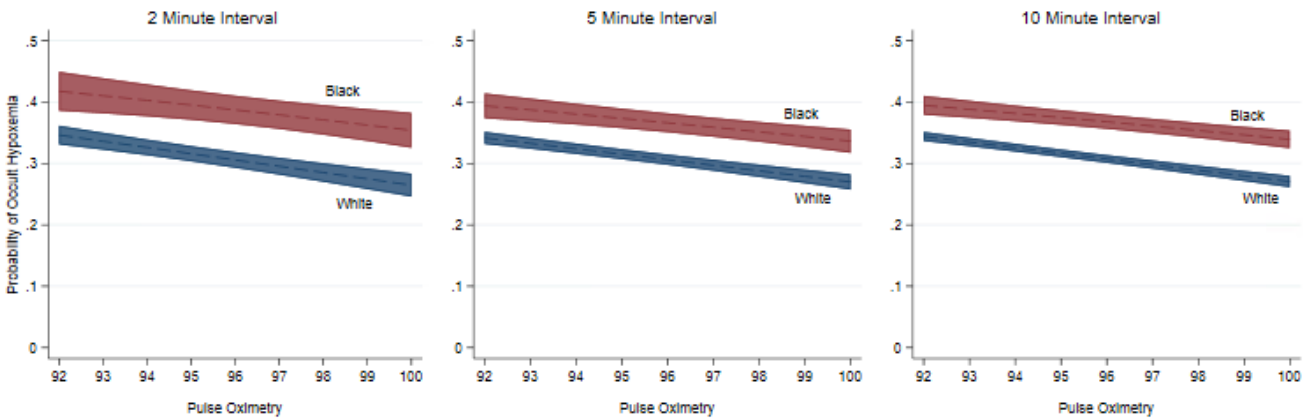

**Appendix 8.** Probability of occult hypoxemia for White and Black patients including a hospital-level random effect.

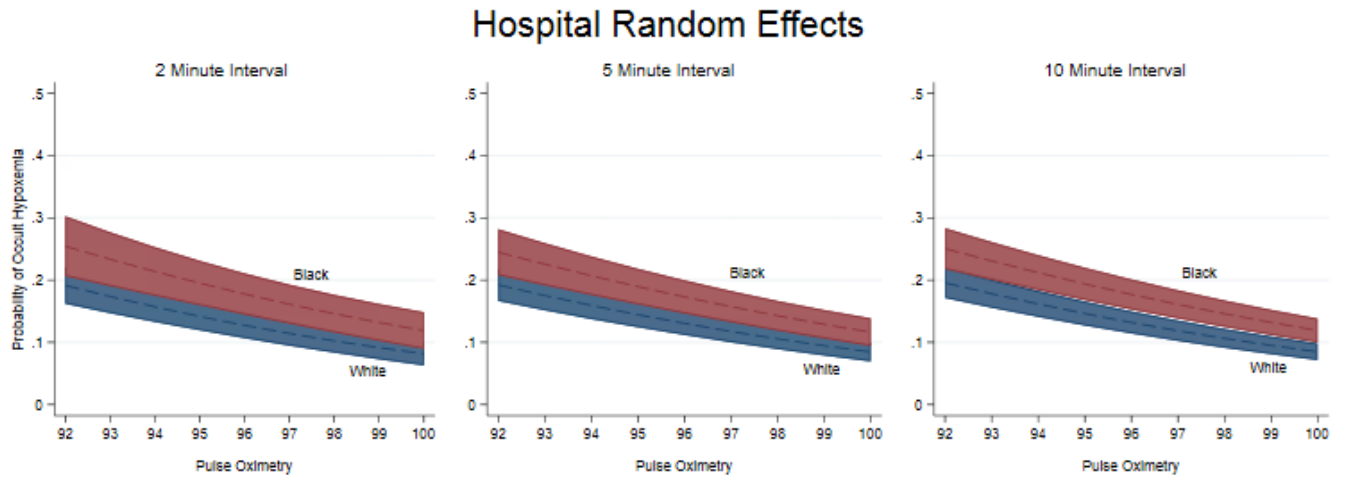

## Appendix 9. Post Hoc analysis of surgical vs non-surgical patients

Of the SaO<sub>2</sub>-SpO<sub>2</sub> pairs, only 580 pairs—approximately 10%—from Black patients and 1,758 pairs from White patients occur on surgical services on patient-days outside the ICU.

In the interacted analysis, there was no large difference between surgical and non-surgical patients:

Non-surgical patients: Black patients have a 4.0% greater chance of hypoxemia than White patients ( $p < 0.001$ , CI 2.7%, 5.4%)

Surgical patients: Blacks have a 2.7% greater chance of hypoxemia than Whites ( $p < 0.001$ , CI= 1.7%, 3.6%)

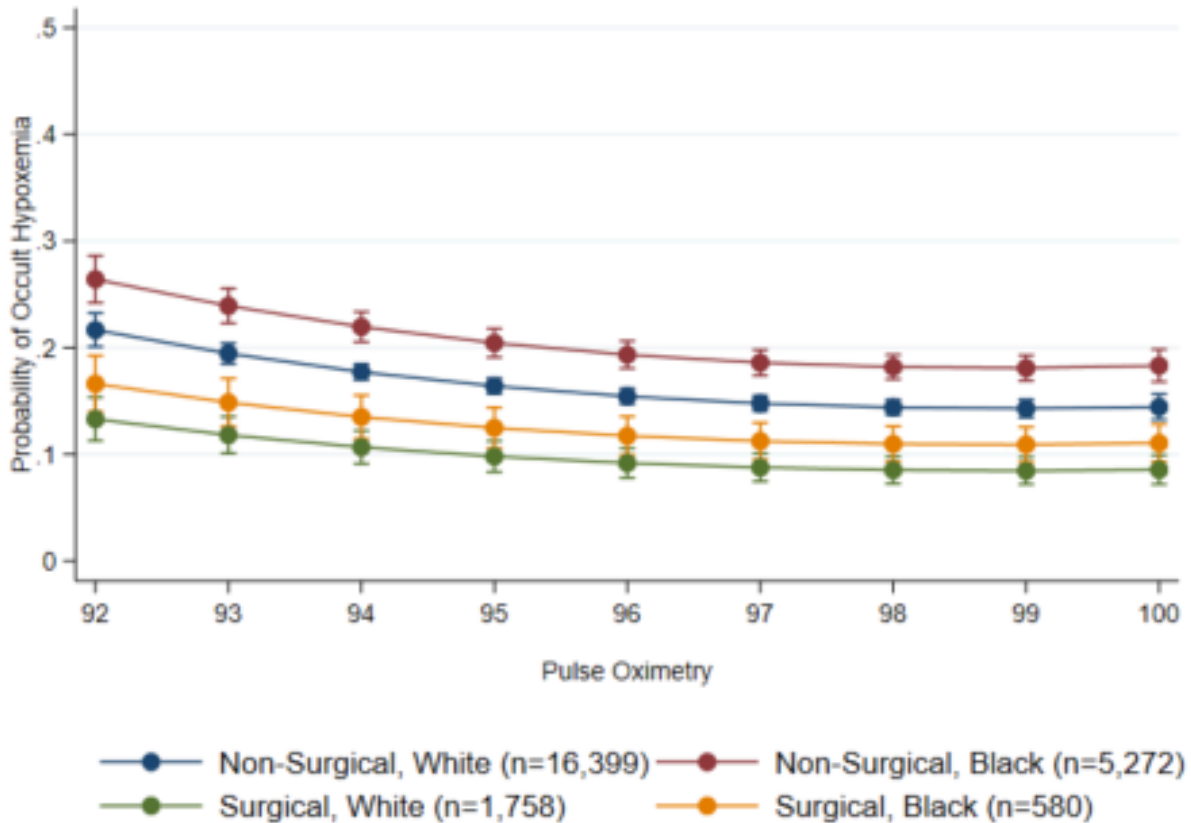

However, in fully stratified analyses in this small, post-hoc population, it appears there is no difference in occult hypoxemia by race—the point estimates and confidence intervals overlap:

### White and Black Surgical Patients

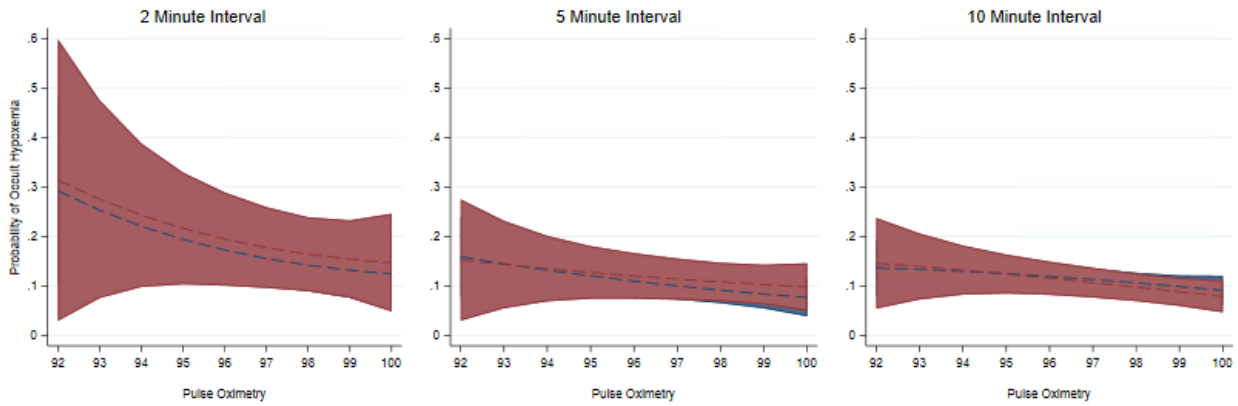

At the same subset of VA hospitals that perform surgeries, a racial differential was present in non-surgical patients:

### White and Black Non-surgical Patients in Hospitals with Surgeries

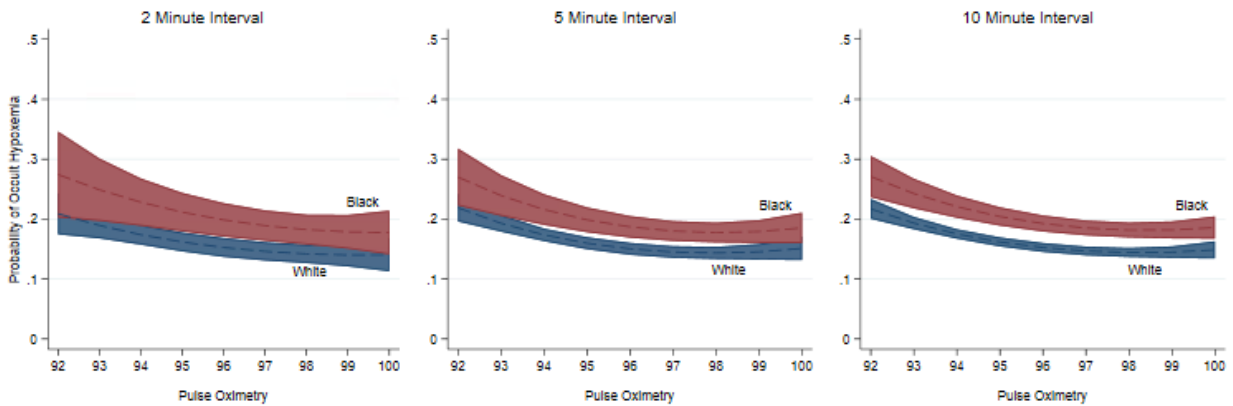

Supplement: valv069775.ww1.pdf [file valv069775.ww1.pdf]
